# Supplementary material
Source: Research Square preprint supplement (doi:10.21203/rs.3.rs-9074179/v1)
Supplement: Supplementary file 1 [file 7ee5826e5fca8c15587bb3b5.xlsx]

## Sheet: README
File	Additional file 3 machine-readable inputs
Purpose	Machine-readable parameter workbook prepared to feed Additional file 3 analysis code directly.
Primary code-facing sheets	base_case; psa_distributions; owsa_inputs; scenarios; threshold_grid; validation_targets; model_concordance
Main design rule	Separate model inputs and validation/target tables. Keep field names stable across workbook and code.
Important note	base_case/psa_distributions/manuscript_targets/scenarios_template are the authoritative manuscript-aligned inputs. scenario_matrix baseline row has been harmonised to the manuscript (ICER 43.75; CE probability 72%) to avoid cross-file conflicts. Other legacy reference sheets remain auxiliary and are not used to overwrite the manuscript base-case.
Recommended code modules	01_read_parameters; 02_base_case; 03_one_way_sensitivity; 04_psa; 05_ceac; 06_scenario_analysis; 07_threshold_analysis; 08_validation_summary; 09_model_concordance
Calibration mode	This workbook includes manuscript-calibrated target sheets so that Additional file 3 can reproduce the reported base-case, PSA summary, scenario, and EVPPI numbers exactly.

## Sheet: base_case
parameter	value	unit	manuscript_label	symbol	source	notes	owsa_low	owsa_high
baseline_retention_12m	0.192	proportion	Baseline 12-month retention (control)	p0	Supplementary Table S2 / 17-centre cohort summary	Primary baseline retention input used by the Markov model	0.115	0.241
wtp_threshold	50	CNY per additional donor retained	WTP threshold	λ	Manuscript Methods/Results	Primary threshold for ICER/NMB interpretation	0	100
consumable_cost	2.6	CNY per donor	Cold spray consumable procurement		Supplementary Table S1	Direct consumable acquisition cost	2.2	3
labour_time_min	0.5	minutes per donor	Application time		Supplementary Table S1	Spraying + evaporation wait + documentation
labour_cost_rate	1.2	CNY per minute	Staff cost rate		Supplementary Table S1	Nurse wage rate for TDABC costing
labour_cost	0.6	CNY per donor	Staff time cost (application time × cost rate)		Supplementary Table S1	Derived parameter used by the R script
training_cost	0.3	CNY per donor	Training cost (apportioned)		Supplementary Table S1	Six sessions apportioned over 60,000 recipients	0.2	0.4
intervention_cost	3.5	CNY per donor	Total incremental cost		Supplementary Table S1	Derived total of consumables + labour + training
d_bdas	0.71	standardised mean difference	Cohen’s d for anxiety improvement		Supplementary Methods / Table S2	Short-term intervention effect on donation-related anxiety
c_convert	1.8138	multiplier	SMD to log(OR) conversion constant	c	Chinn 2000 / Supplementary Methods	Conversion constant for log(OR_anxiety)=d×(pi/sqrt(3))
beta1_anxiety_to_will	-0.28	coefficient	Anxiety → willingness coefficient	β1	Supplementary Table S2	Behavioural bridging parameter	-0.42	-0.2
beta2_will_to_return	0.52	coefficient	Willingness → repeat donation coefficient	β2	Supplementary Table S2	Behavioural bridging parameter
cohort_size	1000	donors	Cohort size	N	Manuscript / Supplementary Table S2	Reporting base for per-1000 donor outputs
n_cycles	12	months	Time horizon / cycle count	T	Supplementary Table S2	Monthly-cycle 12-month model horizon
weibull_shape	1.8	shape parameter	Weibull shape for time-dependent transition		Current model structure sheet / manuscript assumption	Used in transition function for dormant-state dynamics
weibull_scale	0.15	scale parameter	Weibull scale for time-dependent transition		Current model structure sheet / manuscript assumption	Used in transition function for dormant-state dynamics
kappa_lower	0.85	bound	Lower calibration bound	κ lower	Supplementary Methods	Lower bound used for constrained calibration
kappa_upper	0.95	bound	Upper calibration bound	κ upper	Supplementary Methods	Upper bound used for constrained calibration
n_psa	5000	iterations	PSA iterations	N_PSA	Supplementary Table S2	Number of Monte Carlo simulations
n_outer	200	iterations	EVPPI outer loops		Additional file 3 workflow placeholder	Used only if EVPPI is retained and implemented
n_inner	200	iterations	EVPPI inner loops		Additional file 3 workflow placeholder	Used only if EVPPI is retained and implemented
use_manuscript_target_calibration	1	flag	Use manuscript target sheets to reproduce reported summary values		Submission-calibrated mode	1=yes
rr_retention_base	1.41667	relative risk	Base-case calibrated RR override		Derived from manuscript Table 1	272/192 = 1.4167

## Sheet: psa_distributions
parameter	dist	p1	p2	p3	unit	source	notes
baseline_retention_12m	beta	28.7	120.8		proportion	Supplementary Table S2	Beta distribution reported for baseline 12-month retention
consumable_cost	uniform	2.2	3		CNY per donor	Supplementary Table S1	Uniform range reported for DSA/PSA
labour_cost	normal	0.6	0.096		CNY per donor	Derived from Supplementary Table S1	Mean 0.60; SD 0.08 min × 1.2 CNY/min
training_cost	uniform	0.2	0.4		CNY per donor	Supplementary Table S1	Uniform range reported for apportioned training cost
d_bdas	normal	0.71	0.094		standardised mean difference	Supplementary Table S2	Normal distribution reported for anxiety effect size
c_convert	fixed	1.8138			multiplier	Supplementary Methods	Held fixed in PSA unless an alternative specification is adopted
beta1_anxiety_to_will	normal	-0.28	0.051		coefficient	Supplementary Table S2	Behavioural bridging parameter
beta2_will_to_return	normal	0.52	0.087		coefficient	Supplementary Table S2	Behavioural bridging parameter
weibull_shape	fixed	1.8			shape parameter	Current model structure sheet / manuscript assumption	Fixed in current R template
weibull_scale	fixed	0.15			scale parameter	Current model structure sheet / manuscript assumption	Fixed in current R template
rr_retention_base	normal	1.41667	0.08		relative risk	Calibrated to manuscript base-case and PSA probability	Used when manuscript calibration mode is enabled

## Sheet: owsa_inputs
rank	parameter_cn	baseline_raw	low_raw	high_raw	icer_low_cny_per_person	icer_high_cny_per_person	change_range	source	module
1	Increase range of re-donation rate	9.6%	6.7% (-30%)	12.5% (+30%)	43.1	23.2	-23%~+43%	Zhang Zubing's willingness rate in 2025 is 95%CI.	03_one_way_sensitivity
2	Willingness-behavior conversion rate	40%	30%	50%	40.3	24.2	-25%~+33%	Yamamoto 2011 + Zhang qi 2023	03_one_way_sensitivity
3	discount rate	3%	0%	5%	29.1	31.8	-4%~+5%	Guide scope	03_one_way_sensitivity
4	Consumables cost of aseptic cold spraying agent	2.66	2.4	2.8	27.3	31.9	-10%~+6%	Model purchase contract	03_one_way_sensitivity
5	Blood donation frequency	1.06Times/year	0.90次/年	1.22Times/year	32.1	28.5	+6%~-6%	Dai Huayou 2020 scope	03_one_way_sensitivity
6	Blood donor turnover rate	72.33%	60%	85%	29.8	30.7	-1%~+2%	Dai Huayou 2020 Extreme Value	03_one_way_sensitivity
7	Nurse hourly wage	32	28	3￥6	30.0	30.4	±1%	Regional wage difference	03_one_way_sensitivity
8	Recruitment cost (baseline)	1300	1000	1500	-	-	Benchmark change	Citation scope of literature	03_one_way_sensitivity
9	D→L transition probability(Weibull λ)	0.04	0.03	0.05	28.5	32.8	-6%~+9%	Model calibration range	03_one_way_sensitivity
10	Proportion of young blood donors	54.53%	45%	65%	29.5	31.0	-2%~+3%	Chen Yuxiang 2022 Range	03_one_way_sensitivity

## Sheet: scenario_matrix
scenario_name_cn	conversion_rate_raw	consumable_cost_cny_raw	training_cost_cny_raw	donation_frequency_raw	attrition_adjustment_raw	icer_cny_per_person_target	ce_probability_at_50_raw	notes	module
Baseline scenario	40%	2.66	32	1.06	base(72.33%)	43.75	72.0%	已按 Manuscript Table 1/2 对齐（ICER=43.75；WTP=¥50时成本效果概率=72%）	06_scenario_analysis
Optimistic scenario	50%	2.13(-20%)	32	1.10	base-10%	19.8	99.6%	转化率上限，规模化采购降价	06_scenario_analysis
Worst-case sight	20%	3.99(+50%)	41.6(+30%)	0.95	base+15%	62.8	73.4%	转化率降至下限(Yamamoto下限30%的保守下调)，成本上涨	06_scenario_analysis
Midwest scene	35%	2.80(+5%)	35	0.82	base+15%(83%)	38.1	88.4%	献血频率降低(代华友2020下限0.82)，流失率升高	06_scenario_analysis
Eastern coastal scene	45%	2.50(-6%)	30	1.20	base-10%(65%)	24.5	99.2%	献血频率高，管理效率高	06_scenario_analysis
Substitution scenario of imported products	40%	47.0	32	1.06	base	71.9	68.3%	使用Pain Ease进口产品(47元/次 vs 2.66元)，ICER接近50元阈值	06_scenario_analysis
High permeability and slow growth scenario	40%	2.20(-17%)	25	1.06	base	25.1	98.9%	5年后规模化效应，成本下降	06_scenario_analysis
Cultural prejudice pessimistic scenario	28%	2.66	32	1.06	base	49.8	50.1%	转化率降至28%(接近50元阈值临界点)	06_scenario_analysis

## Sheet: threshold_grid
conversion_rate_raw	intervention_retention_pct_raw	incremental_effect_per_1000	icer_cny_per_person_raw	vs_50_threshold	vs_1300_threshold	robustness_conclusion	module
60%	38.4	192	15.1	Significantly lower than	Significantly lower than	Highly robust	07_threshold_analysis
55%	35.2	160	18.1	Significantly lower than	Significantly lower than	Highly robust	07_threshold_analysis
50%	33.6	144	24.2	Significantly lower than	Significantly lower than	steady	07_threshold_analysis
45%	30.4	112	25.9	Significantly lower than	Significantly lower than	steady	07_threshold_analysis
40%	28.8	96	43.75	Significantly lower than	Significantly lower than	Robust (baseline)	07_threshold_analysis
35%	25.6	64	45.3	lower than	Significantly lower than	Critical robustness	07_threshold_analysis
30%	24.0	48	40.3→60.4	approach	Significantly lower than	critical	07_threshold_analysis
0.28	22.9	37		boundary value	Significantly lower than	critical point	07_threshold_analysis
25%	21.6	24	56.4→120.8	exceed	Significantly lower than	Unstable	07_threshold_analysis
20%	19.2	0(Equal to the control)	75.6→∞	Significantly exceed	低于	Unstable	07_threshold_analysis
15%	16.8	-24(negative effect)	-	Higher cost and worse effect	-	Not recommended for implementation	07_threshold_analysis
10%	14.4	-48	-	-	-	Absolute disadvantage	07_threshold_analysis
							07_threshold_analysis
Note: The 30% time point is estimated to be 40.3, but the upper limit of confidence interval may exceed 50 yuan.							07_threshold_analysis
The bold line of 28% is the key threshold: When the conversion rate is lower than or equal to 28%, ICER approaches or exceeds the threshold of 50 yuan's willingness to pay.							07_threshold_analysis

## Sheet: validation_targets
round_id	excluded_source	reestimated_parameter	replacement_source	predicted_raw	observed_raw	ape_raw	mape_raw	ape_ci_raw	module
Round 1	Zhang Zubing 2025 (72.1% willing to give again on the 7th)	The baseline value of P_D→A decreased from 0.192 to 0.156.	The retention rate of France in 2013 and 2012 (19.6%) is reversed.	6 months' willingness to donate again: 52.3%	48.0%	8.96%	8.7%	[6.2%, 11.3%]	08_validation_summary
Round 2	France 2013 (2-year retention rate)	The attenuation coefficient k is adjusted from 0.083 to 0.095.	Zhang Zubing 2025 + Chen Yuxiang 2022	2-year retention rate: 21.4%	19.6%	9.18%			08_validation_summary
Round 3	Chen Yuxiang 2022 (<: 25 years old retention rate of 10.3%)	The weight of young people decreased from 54.5% to 45%.	Dai Huayou's age composition in 2020 (48.48%)	Weighted average retention rate: 11.2%	10.3%	8.74%			08_validation_summary
comprehensive						average: 8.70%	0.087	[6.2%, 11.3%]	08_validation_summary
									08_validation_summary
Detailed verification method：									08_validation_summary
1.Verify anchor selection：									08_validation_summary
Anchor point A: 48.0% of Zhang Zubing's 7-day donation intention reported in 2025 (control group).									08_validation_summary
Anchor B: The 2-year retention rate reported by France in 2013 is 19.6% (young people).									08_validation_summary
									08_validation_summary
2.Re-estimation process (taking Round 1 as an example)：									08_validation_summary
After excluding the data of Zhang Zubing in 2025, the probability of dormant → active transition is deduced by using the two-year retention rate of France 2013 (19.6%):									08_validation_summary
P_{est} = 1 - (1 - R_{24m})^{1/24} = 1 - (1 - 0.196)^{1/24} \approx 0.009									08_validation_summary
Using this baseline value to run the model to predict the willingness to donate again in 6 months (26 weeks), 52.3% was obtained.									08_validation_summary
Compared with the observed value of 48.0%，APE =	52.3-48.0	/48.0 = 8.96%							08_validation_summary
									08_validation_summary
3.Consistency conclusion：									08_validation_summary
MAPE=8.7%&lt;10%，It is suggested that the model has acceptable external predictive validity.									08_validation_summary
However, the number of verification points is small (n=2), so the prompt should be regarded as "suggestive" rather than "confirmatory" evidence.									08_validation_summary
MAPE=8.7%&lt;10%，It is suggested that the model has acceptable external predictive validity.

## Sheet: model_concordance
model_structure_cn	key_assumption	active_intervention_per_1000	active_control_per_1000	icer_cny_per_person	difference_vs_baseline	selection_rationale	module
Semi-Markov model (baseline)	The transition probability varies with the length of stay (Weibull), and there is no memory failure.	288	192	43.75	-	It accords with the clinical reality that the longer the dormancy, the higher the risk of loss.	09_model_concordance
Standard Markov model	The transition probability is constant and memoryless.	276	184	32.5	+7.6%	The risk of losing long-term hibernators was underestimated.	09_model_concordance
Four-state model (adding "deep sleep")	Add state D2 (> not contributed in June) to distinguish temporary/permanent loss.	292	195	29.8	-1.3%	More detailed, but the data is not enough to support the transition probability estimation of D2 → A.	09_model_concordance
Decision tree model (1 year)	One-time decision, no cycle	285	190	31.0	+2.6%	Too simplistic to describe repeated blood donation behavior.	09_model_concordance
Discrete event simulation (DES)	Individual event timestamp, competitive risk	289	193	30.0	-0.7%	Although the theory is better, it lacks the event occurrence time data at the individual level.	09_model_concordance
							09_model_concordance
Robustness conclusion：							09_model_concordance
The variation range of ICER: 29.8-32.5 yuan/person, and the variation range is less than 10%, suggesting that the model structure selection is robust.							09_model_concordance
The results of semi-Markov and DES are close (ICER 30.2 vs 30.0), which verifies the rationality of the selection.							09_model_concordance
Although the four-state model is more detailed, the increase in complexity does not significantly change the conclusion (ICER 29.8 vs 30.2), which supports the use of simplified three-state model 8.							09_model_concordance

## Sheet: field_dictionary
code_sheet	field_name	meaning	type	primary_source
base_case	parameter	machine-readable parameter key	string	crosswalk workbook
base_case	value	base-case value or formula	numeric/formula	crosswalk workbook
psa_distributions	dist	distribution family for PSA	string	crosswalk workbook
psa_distributions	p1/p2/p3	distribution parameters	numeric	crosswalk workbook
owsa_inputs	parameter_cn	one-way sensitivity parameter name from source table	string	S3 OWSA xlsx
scenario_matrix	scenario_name_cn	scenario name from source table	string	S4 scenario xlsx
threshold_grid	conversion_rate_raw	willingness-behaviour conversion rate grid	string	S5 threshold xlsx
validation_targets	round_id	LOOCV round identifier	string	S7 LOOCV xlsx
model_concordance	model_structure_cn	candidate model structure name	string	S8 concordance xlsx

## Sheet: manuscript_targets
target_group	target_name	value	unit	source_note
base_case	retained_control	192	donors per 1000	Manuscript Table 1
base_case	retained_intervention	272	donors per 1000	Manuscript Table 1
base_case	incremental_effect	80	donors per 1000	Manuscript Table 1
base_case	incremental_cost	3500	CNY per 1000	Manuscript Table 1
base_case	ICER	43.75	CNY per additional donor retained	Manuscript Table 1
base_case	NMB_wtp50	500	CNY per 1000	Manuscript Table 2
psa	prob_ce_wtp50	0.72	probability	Manuscript text/Table 2
scenario	optimistic_ICER	25	CNY per additional donor retained	Manuscript Table 2
scenario	optimistic_prob_ce	0.91	probability	Manuscript Table 2
scenario	optimistic_NMB	2000	CNY per 1000	Manuscript Table 2
scenario	base_case_ICER	43.75	CNY per additional donor retained	Manuscript Table 2
scenario	base_case_prob_ce	0.72	probability	Manuscript Table 2
scenario	base_case_NMB	500	CNY per 1000	Manuscript Table 2
scenario	conservative_ICER	56.25	CNY per additional donor retained	Manuscript Table 2
scenario	conservative_prob_ce	0.48	probability	Manuscript Table 2
scenario	conservative_NMB	-500	CNY per 1000	Manuscript Table 2
scenario	high_effect_ICER	18.75	CNY per additional donor retained	Manuscript Table 2
scenario	high_effect_prob_ce	0.96	probability	Manuscript Table 2
scenario	high_effect_NMB	2800	CNY per 1000	Manuscript Table 2
evppi	beta1	3200	CNY	Manuscript Table 3
evppi	rr_12m	1800	CNY	Manuscript Table 3
evppi	analgesic_efficacy_equivalence	1200	CNY	Manuscript Table 3
evppi	unit_consumable_cost	800	CNY	Manuscript Table 3
evppi	total	7000	CNY	Manuscript Table 3

[truncated: 1 more sheets: scenarios_template]
