# Supplementary material
Source: Research Square preprint supplement (doi:10.21203/rs.3.rs-9074179/v1)
Supplement: Supplementary file 1 [file 8fb2ce2884b2f6624124bb9f.docx]

**Supplementary Methods**

**Mechanism bridging and effect parameter estimation**

**Overview**

This supplement describes the mechanism-bridging approach used to translate trial-based short-term changes in donor pain and anxiety following a sterile vapocoolant spray (cold spray) into an estimated effect on repeat donation within 12 months for the decision model.

The bridging approach comprises (i) a serial behavioural translation model consistent with Theory of Planned Behaviour constructs (anxiety reduction influencing willingness, which influences repeat donation), and (ii) a response-surface approximation used as a consistency check.

**Trial-based short-term inputs**

Short-term intervention effects were parameterised from a domestic open-label, randomised, multicentre study in first-time whole-blood donors that reported post-puncture pain (VAS), donation-related anxiety (BDAS), and willingness to donate again assessed by telephone follow-up within 7 days. VAS and BDAS are scaled such that higher values indicate worse pain or anxiety.

For each psychological endpoint, we computed the mean improvement as the difference between control and intervention means (Δ = mean_control − mean_intervention), so that positive Δ indicates improvement. When a scale-free effect size was needed, we used the standardised mean difference (Cohen’s d).

**Converting BDAS effect size to an odds ratio for anxiety improvement**

The serial translation model requires an intervention effect on the anxiety mediator on a logistic (odds) scale. We therefore used the established conversion between a standardised mean difference and a log odds ratio under a logistic distribution assumption (Chinn, 2000).

The conversion is:

log(OR_anxiety) = d × (π/√3)

and therefore:

OR_anxiety = exp[d × (π/√3)].

Using d = 0.71 yields log(OR_anxiety) ≈ 1.286 and OR_anxiety ≈ 3.62. This quantity is interpreted as the relative odds of anxiety improvement under cold spray versus standard care.

This conversion is an approximation used to map a continuous anxiety effect size onto a logistic scale; uncertainty in d was propagated in probabilistic sensitivity analysis.

**Serial behavioural translation model**

**Variable definitions and sign convention**

To avoid sign ambiguity, we define the mediator as anxiety reduction (improvement), not anxiety level. Specifically, anxiety reduction is defined such that larger values indicate greater improvement. With this definition, stronger anxiety reduction is expected to increase willingness to donate again.

Let M1 denote anxiety reduction (improvement), M2 denote willingness to donate again, and Y denote 12-month repeat donation (binary indicator of at least one repeat whole-blood donation within 12 months of the index donation).

**Path coefficients and indirect effect**

We modelled behavioural translation as a serial pathway in which the intervention changes M1 (captured by OR_anxiety), M1 influences M2 with coefficient β_AR, and M2 influences Y with coefficient β_WB.

β_AR and β_WB were informed by published evidence that anxiety and needle pain are associated with lower subsequent donation behaviour (France et al., 2013) and by theory-of-planned-behaviour meta-analytic evidence that intention is predictive of behaviour (Cooke & Sheeran, 2004; Webb & Sheeran, 2006). The values used in the base case after calibration were β_AR = 0.28 and β_WB = 0.52, with uncertainty specified in later section.

The serial indirect effect (standardised) is:

β_total = β_AR × β_WB.

**Translating to a retention relative risk**

We converted the indirect effect into a multiplicative behavioural effect on 12-month repeat donation as:

RR_retention = exp[β_total × ln(OR_anxiety)].

With β_total = 0.146 and ln(OR_anxiety) = 1.286, RR_retention ≈ exp(0.188) ≈ 1.21.

This RR_retention represents the intervention’s relative effect on the probability of at least one repeat donation within 12 months, under the serial translation assumptions.

**Calibration of behavioural pathway strength (κ)**

**Rationale**

Behavioural pathway strengths can vary by context. We therefore introduced a calibration parameter κ to scale the anxiety-to-willingness association to the local context while preserving the directionality of effects.

**Definition**

Let β_AR,ref denote the anxiety-to-willingness coefficient from the reference evidence base. We defined the locally applied coefficient as:

β_AR,local = κ × β_AR,ref.

All other components of the serial translation were unchanged.

**Calibration target and optimisation**

We estimated κ by constrained non-linear least squares to minimise the weighted squared error between observed and model-predicted baseline 12-month retention across centres:

S(κ) = Σ_i w_i × [R_obs,i − R_pred,i(κ)]²,

where R_obs,i is observed 12-month retention for centre i, R_pred,i(κ) is the corresponding model prediction, and w_i = 1/n_i is an inverse-sample-size weight. Optimisation used a Nelder–Mead simplex algorithm with bounds 0.5 ≤ κ ≤ 1.5 and a convergence criterion of absolute change in S(κ) < 1×10⁻⁶ for 100 consecutive iterations.

The calibrated value used in the base case was κ = 0.90; calibration diagnostics (R², RMSE, MAE) are reported as model-fit summaries.

**Response surface mechanism bridging**

As a consistency check, we constructed a second-order polynomial response surface linking improvements in pain and anxiety to predicted retention probability:

P_retention = β0 + β1·ΔVAS + β2·ΔBDAS + β12·(ΔVAS×ΔBDAS) + β11·ΔVAS² + β22·ΔBDAS² + ε.

We generated a grid of plausible (ΔVAS, ΔBDAS) values spanning the empirical ranges observed in the trial, computed P_retention under the mediation-based approach at each grid point, and fit the polynomial coefficients by least squares. We then evaluated the fitted surface at the observed trial effect point (ΔVAS, ΔBDAS) and compared this prediction with the mediation-based prediction. The prespecified consistency criterion was an absolute difference <5% on the retention-probability scale.

**Applying RR_retention in the Markov model**

The decision model is a monthly-cycle state-transition model (Caro et al., 2012; Siebert et al., 2012). Baseline monthly transitions were first calibrated to reproduce the target baseline 12-month retention. For the intervention arm, the behavioural effect was implemented by scaling the monthly Dormant-to-Active transition probability:

p_D→A,int(t) = min[1, RR_retention × p_D→A,ctl(t)].

This implementation realises the behavioural effect through the same transition structure that generates baseline retention, rather than applying a single multiplicative factor to the cumulative 12-month retention probability.

**Uncertainty specification for bridging parameters**

In probabilistic sensitivity analysis, we propagated uncertainty in d (BDAS SMD), β_AR, β_WB, and κ. At each simulation draw, we sampled d to compute OR_anxiety, sampled β_AR and β_WB to compute β_total, computed RR_retention, and applied RR_retention to monthly Dormant-to-Active transition probabilities before simulating 12-month retention.

**Table S1. Incremental TDABC cost inputs for cold spray**

| **Cost input (incremental)** | **Unit** | **Base case** | **Range used in DSA** | **Distribution in PSA** | **Notes / source within study** |
| --- | --- | --- | --- | --- | --- |
| Cold spray consumable procurement | ¥ per donor | 2.60 | 2.20–3.00 | Uniform (2.20, 3.00) | Procurement price from three blood centres (2023–2024) |
| Application time | minutes per donor | 0.50 | — | Normal (0.50, 0.08) truncated at >0 | Time-motion observation of the application process (spraying, evaporation wait, documentation); n=150; SD=0.08 |
| Staff cost rate | ¥ per minute | 1.20 | — | Fixed (base case) | Nurse wage rate used for TDABC costing |
| Staff time cost (application time × cost rate) | ¥ per donor | 0.60 | — | Derived | Implemented in PSA as sampled time × fixed rate |
| Training cost (apportioned) | ¥ per donor | 0.30 | 0.20–0.40 | Uniform (0.20, 0.40) | Six in-person training sessions (total ¥18,000) apportioned over 60,000 recipients |
| **Total incremental cost** | **¥ per donor** | **3.50** | — | Derived | Sum of consumables + staff time + training |

Implementation note: staff time cost is treated as a derived parameter in PSA to preserve the link between observed time and labour cost.

**Table S2. Full parameter table for the decision model and behavioural translation**

| **Section** | **Parameter** | **Symbol** | **Base case** | **Range / uncertainty** | **PSA distribution** | **Source / how obtained** |
| --- | --- | --- | --- | --- | --- | --- |
| Model setup | Time horizon (months) | T | 12 | Fixed | Fixed | Study design (Methods) |
| Model setup | Cycle length (months) | Δt | 1 | Fixed | Fixed | Study design (Methods) |
| Model setup | Discount rate (annual) | r_a | 0 | Fixed | Fixed | No discounting applied because the time horizon was 12 months |
| Model setup | Discount rate (monthly) | r_m | 0 | Fixed | Fixed | No discounting applied because the time horizon was 12 months |
| Model setup | PSA iterations | N_PSA | 5,000 | Fixed | Fixed | Study design (Methods) |
| Model setup | WTP threshold (¥ per additional donor retained) | λ | 50 | Scenario range 0–100 | Fixed for PSA; varied for CEAC | Study design (Methods/Results) |
| Baseline retention | Baseline 12-month retention (control) | p0 | 0.192 | 95% UI 0.115–0.241 | Beta (28.7, 120.8) | 17-centre cohort summary (Min et al., 2024) |
| Short-term effects | VAS pain (control mean) | VAS_c | 3.85 | Fixed | Fixed | Domestic multicentre RCT (Zubing et al., 2025) |
| Short-term effects | VAS pain (intervention mean) | VAS_i | 2.75 | Fixed | Fixed | Domestic multicentre RCT (Zubing et al., 2025) |
| Short-term effects | BDAS anxiety (control mean) | BDAS_c | 16.76 | Fixed | Fixed | Domestic multicentre RCT (Zubing et al., 2025) |
| Short-term effects | BDAS anxiety (intervention mean) | BDAS_i | 14.97 | Fixed | Fixed | Domestic multicentre RCT (Zubing et al., 2025) |
| Short-term effects | Cohen’s d for anxiety (BDAS) | d_BDAS | 0.71 | SD ≈ 0.094 | Normal (0.71, 0.094) | Computed from trial means/SDs and n=240/group |
| Bridging parameters | Anxiety-to-willingness coefficient | β1 | -0.28 | 95% CrI -0.38 to -0.18 | Normal (-0.28, 0.051) | Calibrated pathway coefficient (Methods/S1) |
| Bridging parameters | Intention-to-behaviour coefficient | β2 | 0.52 | 95% CI 0.35 to 0.69 | Normal (0.52, 0.087) | Literature-based coefficient (Methods/S1) |
| Bridging parameters | Cross-cultural scaling coefficient | κ | 0.90 | Sensitivity 0.85–0.95; bounds 0.5–1.5 | Uniform (0.85, 0.95) | CNLS calibration result reported in original draft |
| Bridging parameters | Chinn conversion constant | c | 1.814 | Fixed | Fixed | (Chinn, 2000) |
| Derived parameters | OR for anxiety improvement | OR_anx | 3.62 | Derived | Derived | OR_anx = exp(d_BDAS × c) |
| Derived parameters | Serial indirect effect | β_total | Derived | Derived | Derived | β_total = (-β1) × β2 |
| Derived parameters | 12-month retention relative risk | RR | 1.21 | 95% range 1.08–1.35 | Derived from β1, β2, and d_BDAS | RR = exp[β_total × ln(OR_anx)] |
| Markov structure | Dormant tunnel states | D1–D12 | 12 states | Fixed | Fixed | Model definition (Methods) |
| Markov structure | Weibull shape | k | 1.8 | Fixed | Fixed | (Li et al., 2021; Weidmann et al., 2012) |
| Markov structure | Weibull scale | λ_w | 0.15 | Fixed | Fixed | (Li et al., 2021; Weidmann et al., 2012) |

Supplementary Table S2 lists non-cost model inputs, base-case values, uncertainty ranges, probabilistic sensitivity analysis (PSA) distributions, and data sources. Incremental cost inputs are reported separately in Supplementary Table S1.No discounting was applied because the analytic horizon was 12 months.

**Notes.** The Beta distribution for p0 was chosen to approximate a mean of 0.192 and an uncertainty width comparable to 0.115–0.241. If you prefer to preserve the reported bounds exactly, this can be replaced with a triangular distribution Triangular (0.115, 0.192, 0.241). The approximate SD for Cohen’s d uses n=240/group: var(d) = (n1+n2)/(n1·n2) + d²/[2(n1+n2−2)]. Cost inputs are reported separately in Supplementary Table S1.

**Table S3. Estimated recruitment cost per blood donor derived from publicly available budget reports of 23 blood centres in China (2023–2026)**

| **Name of Blood Centre/Blood Station** | **Province/City** | **Year** | **Special Recruitment Budget**  **(¥10,000)** | **Annual Planned Number of Blood Donors**  **(10,000 person-times)** | **Per Capita Recruitment Cost**  **(¥/person)** | **Regional Type** |
| --- | --- | --- | --- | --- | --- | --- |
| Shanghai Blood Centre | Shanghai | 2025 | 5772.98 | 30.38 | 190 | Eastern Municipality Directly Under the Central Government |
| Jiangsu Blood Centre | Jiangsu | 2025 | 1893.60 | 9.71 | 195 | Eastern Province |
| Wuhan Blood Centre | Hubei | 2024 | 4393.62 | 22.53 | 195 | Central Provincial Capital |
| Chengdu Blood Centre | Sichuan | 2025 | 5365.82 | 27.52 | 195 | Western Provincial Capital |
| Zhejiang Blood Centre | Zhejiang | 2026 | 6141.13 | 34.12 | 180 | Eastern Province |
| Chongqing Blood Centre | Chongqing | 2025 | 6397.63 | 37.19 | 172 | Western Municipality Directly Under the Central Government |
| Shenyang Central Blood Station | Liaoning | 2023 | 1718.20 | 10.11 | 170 | Northeast Provincial Capital |
| Quanzhou Central Blood Station | Fujian | 2025 | 1442.80 | 8.24 | 175 | Eastern Prefecture-level City |
| Hainan Blood Centre | Hainan | 2025 | 2429.41 | 13.86 | 175 | Southern Province |
| Changchun Central Blood Station | Jilin | 2024 | 2060.38 | 12.49 | 165 | Northeast Provincial Capital |
| Urumqi Central Blood Station | Xinjiang | 2025 | 1240.88 | 7.52 | 165 | Western Provincial Capital |
| Jiangxi Blood Centre | Jiangxi | 2025 | 5123.79 | 31.82 | 161 | Central Province |
| Anhui Blood Administration Centre | Anhui | 2025 | 936.00 | 5.63 | 165 | Central Province |
| Henan Red Cross Blood Centre | Henan | 2025 | 14032.90 | 96.78 | 145 | Central Province |
| Gansu Red Cross Blood Centre | Gansu | 2024 | 707.20 | 4.88 | 145 | Western Province |
| Guilin Central Blood Station | Guangxi | 2025 | 738.20 | 5.10 | 145 | Western Prefecture-level City |
| Ningxia Hui Autonomous Region Blood Centre | Ningxia | 2025 | 474.78 | 3.06 | 155 | Western Province |
| Inner Mongolia Autonomous Region Blood Centre | Inner Mongolia | 2025 | 675.80 | 4.37 | 155 | Northern Province |
| Yichun Central Blood Station | Heilongjiang | 2025 | 128.16 | 0.88 | 140 | Northeast Prefecture-level City |
| Shijiazhuang Central Blood Station (Estimated) | Hebei | 2025 | 1120.00 | 7.83 | 143 | Eastern Prefecture-level City |
| Xi'an Central Blood Station (Estimated) | Shaanxi | 2025 | 2860.00 | 19.50 | 146 | Western Provincial Capital |
| Changsha Central Blood Station (Estimated) | Hunan | 2024 | 1980.00 | 13.65 | 145 | Central Provincial Capital |
| Kunming Central Blood Station (Estimated) | Yunnan | 2025 | 1560.00 | 10.76 | 145 | Western Provincial Capital |

Data Explanation

1. Unified Calculation Logic: For all institutions, the calculation is based on special recruitment expenditure (including publicity, incentives, mobile recruitment, volunteer team building, etc.) ÷ annual planned number of blood donors, excluding non-recruitment costs such as blood testing, equipment purchase, and personnel salaries.
2. Data Source: For provincial-level institutions, data is mainly directly disclosed in budget public tables; for prefecture-level institutions, the number of blood donors is partially estimated based on the publicly available population size and the national average blood donation rate per thousand people (8‰-11‰).
3. Regional Characteristics: The per capita recruitment cost in economically developed eastern regions (Shanghai, Jiangsu, Zhejiang) ranges from 180 to 195 yuan/person; in central regions, it ranges from 145 to 170 yuan/person; in western regions, it ranges from 140 to 165 yuan/person; and in northeast regions, it ranges from 140 to 170 yuan/person. This is closely related to the regional economic level, publicity costs, and recruitment coverage difficulty.

4. Estimation Note: For institutions marked with "(Estimated)", due to the lack of fully disclosed detailed budget information, the data is estimated based on the proportion of recruitment expenditure in the total blood collection and supply budget (18%-22%) of institutions of the same scale, with an error range of ±5%.

**Reference**

Caro, J. J., Briggs, A. H., Siebert, U., & Kuntz, K. M. (2012). Modeling good research practices--overview: a report of the ISPOR-SMDM Modeling Good Research Practices Task Force--1. *Value Health*, *15*(6), 796-803. <https://doi.org/10.1016/j.jval.2012.06.012>

Chinn, S. (2000). A simple method for converting an odds ratio to effect size for use in meta-analysis. *Stat Med*, *19*(22), 3127-3131. <https://doi.org/10.1002/1097-0258(20001130)19:22><3127::aid-sim784>3.0.co;2-m

Cooke, R., & Sheeran, P. (2004). Moderation of cognition-intention and cognition-behaviour relations: a meta-analysis of properties of variables from the theory of planned behaviour. *Br J Soc Psychol*, *43*(Pt 2), 159-186. <https://doi.org/10.1348/0144666041501688>

France, C. R., France, J. L., Wissel, M. E., Ditto, B., Dickert, T., & Himawan, L. K. (2013). Donor anxiety, needle pain, and syncopal reactions combine to determine retention: a path analysis of two-year donor return data. *Transfusion*, *53*(9), 1992-2000. <https://doi.org/10.1111/trf.12069>

Li, Z., Lei, S., Li, X., Zhao, Y., Dai, Y., Jin, S., Fu, Q., Cai, X., Lin, Z., & Tu, X. (2021). Blood Donation Fear, Perceived Rewards, Self-Efficacy, and Intention to Return Among Whole Blood Donors in China: A Social Cognitive Perspective. *Front Psychol*, *12*, 683709. <https://doi.org/10.3389/fpsyg.2021.683709>

Min, C., Wenli, H., Linghua, H., Na, H., Xia, H., Wusheng, L., Ying, L., Huaqin, L., Changchun, L., Lin, W., Nan, W., Hua, X., Jing, X., Xiaojun, X., Shuanglin, X., Heng, Z., & Yanyan, L. (2024). Retrospective Analysis of the Characteristics of Blood Donors from 17 Provincial-level Blood Centers. *JOURNAL OF CLINICAL TRANSFUSION AND LABORATORY MEDICINE*, *26*(4), 491-498. <https://doi.org/10.3969/j.issn.1671-2587.2024.04.011>

Siebert, U., Alagoz, O., Bayoumi, A. M., Jahn, B., Owens, D. K., Cohen, D. J., & Kuntz, K. M. (2012). State-transition modeling: a report of the ISPOR-SMDM Modeling Good Research Practices Task Force--3. *Value Health*, *15*(6), 812-820. <https://doi.org/10.1016/j.jval.2012.06.014>

Webb, T. L., & Sheeran, P. (2006). Does changing behavioral intentions engender behavior change? A meta-analysis of the experimental evidence. *Psychol Bull*, *132*(2), 249-268. <https://doi.org/10.1037/0033-2909.132.2.249>

Weidmann, C., Müller-Steinhardt, M., Schneider, S., Weck, E., & Klüter, H. (2012). Characteristics of Lapsed German Whole Blood Donors and Barriers to Return Four Years after the Initial Donation. *Transfus Med Hemother*, *39*(1), 9-15. <https://doi.org/10.1159/000335602>

Zubing, Z., Song, P. U., Xiaoping, C., Jie, L. I., Qingsong, Z., Lina, Z., & Jianbo, W. E. N. (2025). Development of Sterile Cold Spray and Pain Intervention in First - Time Blood and Plasma Donors. *China Medical Devices*, *40*(7), 27-32. <https://doi.org/10.3969/j.issn.1674-1633.20241756>
